# Supplementary material
Source: Springer Nature journal article supplement (https://www.springermedizin.de/resource/supplementary/12903_2014_427_MOESM3_ESM.docx/9516684)

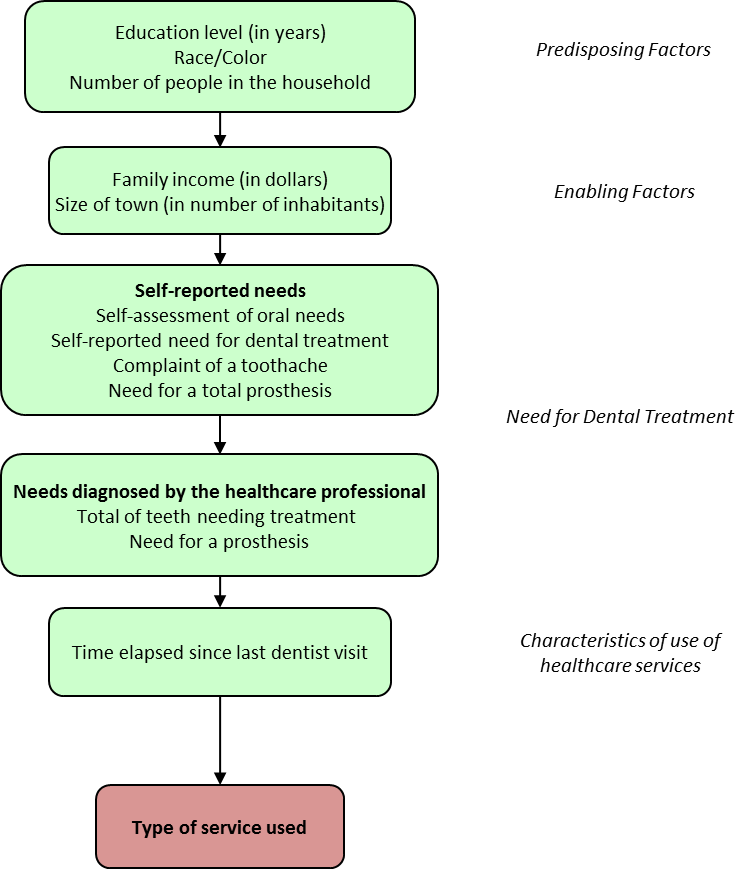


Figure 1. Model of analysis.

Supplement: MOESM3 [file 9516684]
